# Supplementary material for: Genetic Mapping of Head Size Related Traits in Common Carp (Cyprinus carpio)
Source: Front Genet. 2018 Oct 9;9:448. doi: 10.3389/fgene.2018.00448 (PMC6190898; doi:10.3389/fgene.2018.00448)
Supplement: TABLE S3 — Individuals and family information of common carp. NA: information lost. [file Table_3.XLSX]

## Sheet: Sheet1
S3 Table Individuals and family information of common carp. NA: information lost.
Family_ID	Father_PIT	Mother_PIT	Individual_ID
G1	900108000002177	900108000000210	carp1357
G1	900108000002177	900108000000210	carp1359
G1	900108000002177	900108000000210	carp1363
G1	900108000002177	900108000000210	carp1365
G1	900108000002177	900108000000210	carp1366
G1	900108000002177	900108000000210	carp1369
G1	900108000002177	900108000000210	carp1384
G1	900108000002177	900108000000210	carp1393
G1	900108000002177	900108000000210	carp1396
G1	900108000002177	900108000000210	carp1410
G1	900108000002177	900108000000210	carp1414
G1	900108000002177	900108000000210	carp1425
G1	900108000002177	900108000000210	carp1428
G1	900108000002177	900108000000210	carp1429
G1	900108000002177	900108000000210	carp1437
G1	900108000002177	900108000000210	carp1447
G1	900108000002177	900108000000210	carp1448
G1	900108000002177	900108000000210	carp1464
G1	900108000002177	900108000000210	carp1468
G1	900108000002177	900108000000210	carp1469
G1	900108000002177	900108000000210	carp1473
G1	900108000002177	900108000000210	carp1485
G1	900108000002177	900108000000210	carp1496
G1	900108000002177	900108000000210	carp1500
G1	900108000002177	900108000000210	carp1506
G1	900108000002177	900108000000210	carp1512
G1	900108000002177	900108000000210	carp1515
G1	900108000002177	900108000000210	carp1520
G1	900108000002177	900108000000210	carp1521
G1	900108000002177	900108000000210	carp1523
G1	900108000002177	900108000000210	carp1588
G1	900108000002177	900108000000210	carp1591
G1	900108000002177	900108000000210	carp1594
G1	900108000002177	900108000000210	carp1597
G1	900108000002177	900108000000210	carp1603
G1	900108000002177	900108000000210	carp1604
G1	900108000002177	900108000000210	carp1609
G1	900108000002177	900108000000210	carp1613
G1	900108000002177	900108000000210	carp1617
G1	900108000002177	900108000000210	carp1620
G1	900108000002177	900108000000210	carp1625
G1	900108000002177	900108000000210	carp1628
G1	900108000002177	900108000000210	carp1635
G1	900108000002177	900108000000210	carp1636
G1	900108000002177	900108000000210	carp1639
G1	900108000002177	900108000000210	carp1641
G1	900108000002177	900108000000210	carp1645
G1	900108000002177	900108000000210	carp1650
G1	900108000002177	900108000000210	carp1652
G1	900108000002177	900108000000210	carp1661
G1	900108000002177	900108000000210	carp1664
G1	900108000002177	900108000000210	carp1679
G1	900108000002177	900108000000210	carp1701
G1	900108000002177	900108000000210	carp1702
G1	900108000002177	900108000000210	carp1742
G1	900108000002177	900108000000210	carp1744
G1	900108000002177	900108000000210	carp1746
G1	900108000002177	900108000000210	carp1751
G1	900108000002177	900108000000210	carp1752
G1	900108000002177	900108000000210	carp1759
G1	900108000002177	900108000000210	carp1761
G1	900108000002177	900108000000210	carp1772
G1	900108000002177	900108000000210	carp1774
G1	900108000002177	900108000000210	carp1784
G1	900108000002177	900108000000210	carp1786
G1	900108000002177	900108000000210	carp1798
G1	900108000002177	900108000000210	carp1803
G1	900108000002177	900108000000210	carp1806
G1	900108000002177	900108000000210	carp1809
G1	900108000002177	900108000000210	carp1810
G1	900108000002177	900108000000210	carp1815
G1	900108000002177	900108000000210	carp1816
G1	900108000002177	900108000000210	carp1817
G1	900108000002177	900108000000210	carp1819
G1	900108000002177	900108000000210	carp1820
G1	900108000002177	900108000000210	carp1825
G1	900108000002177	900108000000210	carp1837
G1	900108000002177	900108000000210	carp1838
G1	900108000002177	900108000000210	carp1857
G1	900108000002177	900108000000210	carp1862
G1	900108000002177	900108000000210	carp1868
G1	900108000002177	900108000000210	carp1870
G1	900108000002177	900108000000210	carp1875
G1	900108000002177	900108000000210	carp1877
G1	900108000002177	900108000000210	carp1882
G1	900108000002177	900108000000210	carp1889
G1	900108000002177	900108000000210	carp1892
G1	900108000002177	900108000000210	carp1898
G1	900108000002177	900108000000210	carp1904
G1	900108000002177	900108000000210	carp1906
G1	900108000002177	900108000000210	carp1907
G1	900108000002177	900108000000210	carp1917
G1	900108000002177	900108000000210	carp1927
G1	900108000002177	900108000000210	carp1928
G1	900108000002177	900108000000210	carp1931
G1	900108000002177	900108000000210	carp1933
G1	900108000002177	900108000000210	carp1941
G1	900108000002177	900108000000210	carp1943
G1	900108000002177	900108000000210	carp1950
G1	900108000002177	900108000000210	carp1953
G1	900108000002177	900108000000210	carp1956
G1	900108000002177	900108000000210	carp1959
G1	900108000002177	900108000000210	carp1971
G1	900108000002177	900108000000210	carp1973
G2	900108000002177	NA	carp1354
G2	900108000002177	NA	carp1385
G2	900108000002177	NA	carp1387
G2	900108000002177	NA	carp1397
G2	900108000002177	NA	carp1400
G2	900108000002177	NA	carp1409
G2	900108000002177	NA	carp1419
G2	900108000002177	NA	carp1424
G2	900108000002177	NA	carp1435
G2	900108000002177	NA	carp1477
G2	900108000002177	NA	carp1480
G2	900108000002177	NA	carp1489
G2	900108000002177	NA	carp1499
G2	900108000002177	NA	carp1503
G2	900108000002177	NA	carp1508
G2	900108000002177	NA	carp1565
G2	900108000002177	NA	carp1730
G2	900108000002177	NA	carp1743
G2	900108000002177	NA	carp1747
G2	900108000002177	NA	carp1762
G2	900108000002177	NA	carp1763
G2	900108000002177	NA	carp1779
G2	900108000002177	NA	carp1782
G2	900108000002177	NA	carp1861
G2	900108000002177	NA	carp1865
G2	900108000002177	NA	carp1884
G2	900108000002177	NA	carp1912
G2	900108000002177	NA	carp1913
G2	900108000002177	NA	carp1919
G2	900108000002177	NA	carp1937
G2	900108000002177	NA	carp1942
G2	900108000002177	NA	carp1964
G2	900108000002177	NA	carp1976
G3	900108000000218	900108003197858	carp1353
G3	900108000000218	900108003197858	carp1358
G3	900108000000218	900108003197858	carp1405
G3	900108000000218	900108003197858	carp1470
G3	900108000000218	900108003197858	carp1481
G3	900108000000218	900108003197858	carp1482
G3	900108000000218	900108003197858	carp1492
G3	900108000000218	900108003197858	carp1493
G3	900108000000218	900108003197858	carp1495
G3	900108000000218	900108003197858	carp1511
G3	900108000000218	900108003197858	carp1514
G3	900108000000218	900108003197858	carp1527
G3	900108000000218	900108003197858	carp1530
G3	900108000000218	900108003197858	carp1532
G3	900108000000218	900108003197858	carp1549
G3	900108000000218	900108003197858	carp1595
G3	900108000000218	900108003197858	carp1611
G3	900108000000218	900108003197858	carp1669
G3	900108000000218	900108003197858	carp1677
G3	900108000000218	900108003197858	carp1729
G3	900108000000218	900108003197858	carp1740
G3	900108000000218	900108003197858	carp1771
G3	900108000000218	900108003197858	carp1839
G3	900108000000218	900108003197858	carp1847
G3	900108000000218	900108003197858	carp1851
G3	900108000000218	900108003197858	carp1888
G3	900108000000218	900108003197858	carp1890
G3	900108000000218	900108003197858	carp1949
G3	900108000000218	900108003197858	carp1970
G4	900108000000218	900108000000083	carp1402
G4	900108000000218	900108000000083	carp1411
G4	900108000000218	900108000000083	carp1444
G4	900108000000218	900108000000083	carp1461
G4	900108000000218	900108000000083	carp1472
G4	900108000000218	900108000000083	carp1502
G4	900108000000218	900108000000083	carp1572
G4	900108000000218	900108000000083	carp1579
G4	900108000000218	900108000000083	carp1598
G4	900108000000218	900108000000083	carp1599
G4	900108000000218	900108000000083	carp1612
G4	900108000000218	900108000000083	carp1637
G4	900108000000218	900108000000083	carp1651
G4	900108000000218	900108000000083	carp1655
G4	900108000000218	900108000000083	carp1699
G4	900108000000218	900108000000083	carp1703
G4	900108000000218	900108000000083	carp1725
G4	900108000000218	900108000000083	carp1739
G4	900108000000218	900108000000083	carp1754
G4	900108000000218	900108000000083	carp1760
G4	900108000000218	900108000000083	carp1787
G4	900108000000218	900108000000083	carp1802
G4	900108000000218	900108000000083	carp1821
G4	900108000000218	900108000000083	carp1905
G4	900108000000218	900108000000083	carp1922
G4	900108000000218	900108000000083	carp1945
G5	900108000000881	900108000000724	carp1446
G5	900108000000881	900108000000724	carp1881
G6	900108000000881	900108000000588	carp1408
G6	900108000000881	900108000000588	carp1426
G6	900108000000881	900108000000588	carp1436
G6	900108000000881	900108000000588	carp1442
G6	900108000000881	900108000000588	carp1517
G6	900108000000881	900108000000588	carp1531
G6	900108000000881	900108000000588	carp1557
G6	900108000000881	900108000000588	carp1644
G6	900108000000881	900108000000588	carp1648
G6	900108000000881	900108000000588	carp1673
G6	900108000000881	900108000000588	carp1684
G6	900108000000881	900108000000588	carp1696
G6	900108000000881	900108000000588	carp1698
G6	900108000000881	900108000000588	carp1700
G6	900108000000881	900108000000588	carp1714
G6	900108000000881	900108000000588	carp1750
G6	900108000000881	900108000000588	carp1769
G6	900108000000881	900108000000588	carp1793
G6	900108000000881	900108000000588	carp1811
G6	900108000000881	900108000000588	carp1813
G6	900108000000881	900108000000588	carp1841
G6	900108000000881	900108000000588	carp1842
G6	900108000000881	900108000000588	carp1843
G6	900108000000881	900108000000588	carp1855
G6	900108000000881	900108000000588	carp1897
G6	900108000000881	900108000000588	carp1918
G6	900108000000881	900108000000588	carp1934
G6	900108000000881	900108000000588	carp1963
G6	900108000000881	900108000000588	carp1972
G6	900108000000881	900108000000588	carp1984
G6	900108000000881	900108000000588	carp1985
G7	900108000000088	900108003198948	carp1355
G7	900108000000088	900108003198948	carp1361
G7	900108000000088	900108003198948	carp1362
G7	900108000000088	900108003198948	carp1370
G7	900108000000088	900108003198948	carp1375
G7	900108000000088	900108003198948	carp1381
G7	900108000000088	900108003198948	carp1390
G7	900108000000088	900108003198948	carp1395
G7	900108000000088	900108003198948	carp1434
G7	900108000000088	900108003198948	carp1483
G7	900108000000088	900108003198948	carp1510
G7	900108000000088	900108003198948	carp1525
G7	900108000000088	900108003198948	carp1590
G7	900108000000088	900108003198948	carp1593
G7	900108000000088	900108003198948	carp1638
G7	900108000000088	900108003198948	carp1647
G7	900108000000088	900108003198948	carp1668
G7	900108000000088	900108003198948	carp1706
G7	900108000000088	900108003198948	carp1719
G7	900108000000088	900108003198948	carp1756
G7	900108000000088	900108003198948	carp1795
G7	900108000000088	900108003198948	carp1829
G7	900108000000088	900108003198948	carp1895
G7	900108000000088	900108003198948	carp1957
G7	900108000000088	900108003198948	carp1978
G7	900108000000088	900108003198948	carp1986
G9	900108000000088	900108000000106	carp1356
G9	900108000000088	900108000000106	carp1372
G9	900108000000088	900108000000106	carp1382
G9	900108000000088	900108000000106	carp1389
G9	900108000000088	900108000000106	carp1392
G9	900108000000088	900108000000106	carp1432
G9	900108000000088	900108000000106	carp1439
G9	900108000000088	900108000000106	carp1455
G9	900108000000088	900108000000106	carp1478
G9	900108000000088	900108000000106	carp1484
G9	900108000000088	900108000000106	carp1533
G9	900108000000088	900108000000106	carp1601
G9	900108000000088	900108000000106	carp1610
G9	900108000000088	900108000000106	carp1627
G9	900108000000088	900108000000106	carp1640
G9	900108000000088	900108000000106	carp1680
G9	900108000000088	900108000000106	carp1723
G9	900108000000088	900108000000106	carp1728
G9	900108000000088	900108000000106	carp1818
G9	900108000000088	900108000000106	carp1854
G9	900108000000088	900108000000106	carp1856
G9	900108000000088	900108000000106	carp1860
G9	900108000000088	900108000000106	carp1863
G9	900108000000088	900108000000106	carp1866
G9	900108000000088	900108000000106	carp1886
G9	900108000000088	900108000000106	carp1915
G9	900108000000088	900108000000106	carp1921
G9	900108000000088	900108000000106	carp1962
G9	900108000000088	900108000000106	carp1965
G9	900108000000088	900108000000106	carp1966
G9	900108000000088	900108000000106	carp1983
G10	900108000000879	900108000000162	carp1368
G10	900108000000879	900108000000162	carp1413
G10	900108000000879	900108000000162	carp1459
G10	900108000000879	900108000000162	carp1528
G10	900108000000879	900108000000162	carp1555
G10	900108000000879	900108000000162	carp1581
G10	900108000000879	900108000000162	carp1633
G10	900108000000879	900108000000162	carp1642
G10	900108000000879	900108000000162	carp1710
G10	900108000000879	900108000000162	carp1734
G10	900108000000879	900108000000162	carp1773
G10	900108000000879	900108000000162	carp1807
G10	900108000000879	900108000000162	carp1920
G10	900108000000879	900108000000162	carp1924
G10	900108000000879	900108000000162	carp1948
G10	900108000000879	900108000000162	carp1967
G10	900108000000879	900108000000162	carp1968
G10	900108000000879	900108000000162	carp1975
G10	900108000000879	900108000000162	carp1977
G11	900108000000879	999001003220607	carp1379
G11	900108000000879	999001003220607	carp1670
G11	900108000000879	999001003220607	carp1767
G11	900108000000879	999001003220607	carp1812
G12	900108000002177	900108000000486	carp1376
G12	900108000002177	900108000000486	carp1377
G12	900108000002177	900108000000486	carp1380
G12	900108000002177	900108000000486	carp1386
G12	900108000002177	900108000000486	carp1398
G12	900108000002177	900108000000486	carp1401
G12	900108000002177	900108000000486	carp1412
G12	900108000002177	900108000000486	carp1417
G12	900108000002177	900108000000486	carp1418
G12	900108000002177	900108000000486	carp1420
G12	900108000002177	900108000000486	carp1421
G12	900108000002177	900108000000486	carp1423
G12	900108000002177	900108000000486	carp1441
G12	900108000002177	900108000000486	carp1449
G12	900108000002177	900108000000486	carp1450
G12	900108000002177	900108000000486	carp1453
G12	900108000002177	900108000000486	carp1458
G12	900108000002177	900108000000486	carp1474
G12	900108000002177	900108000000486	carp1488
G12	900108000002177	900108000000486	carp1490
G12	900108000002177	900108000000486	carp1505
G12	900108000002177	900108000000486	carp1564
G12	900108000002177	900108000000486	carp1568
G12	900108000002177	900108000000486	carp1587
G12	900108000002177	900108000000486	carp1658
G12	900108000002177	900108000000486	carp1660
G12	900108000002177	900108000000486	carp1663
G12	900108000002177	900108000000486	carp1665
G12	900108000002177	900108000000486	carp1666
G12	900108000002177	900108000000486	carp1674
G12	900108000002177	900108000000486	carp1675
G12	900108000002177	900108000000486	carp1676
G12	900108000002177	900108000000486	carp1690
G12	900108000002177	900108000000486	carp1695
G12	900108000002177	900108000000486	carp1705
G12	900108000002177	900108000000486	carp1708
G12	900108000002177	900108000000486	carp1711
G12	900108000002177	900108000000486	carp1716
G12	900108000002177	900108000000486	carp1735
G12	900108000002177	900108000000486	carp1768
G12	900108000002177	900108000000486	carp1778
G12	900108000002177	900108000000486	carp1783
G12	900108000002177	900108000000486	carp1790
G12	900108000002177	900108000000486	carp1791
G12	900108000002177	900108000000486	carp1792
G12	900108000002177	900108000000486	carp1800
G12	900108000002177	900108000000486	carp1852
G12	900108000002177	900108000000486	carp1869
G12	900108000002177	900108000000486	carp1891
G12	900108000002177	900108000000486	carp1896
G12	900108000002177	900108000000486	carp1900
G12	900108000002177	900108000000486	carp1938
G12	900108000002177	900108000000486	carp1947
G12	900108000002177	900108000000486	carp1979
Z1	900108000002177	900108000000763	carp1346
Z1	900108000002177	900108000000763	carp1347
Z1	900108000002177	900108000000763	carp1348
Z1	900108000002177	900108000000763	carp1360
Z1	900108000002177	900108000000763	carp1364
Z1	900108000002177	900108000000763	carp1373
Z1	900108000002177	900108000000763	carp1374
Z1	900108000002177	900108000000763	carp1388
Z1	900108000002177	900108000000763	carp1391
Z1	900108000002177	900108000000763	carp1394
Z1	900108000002177	900108000000763	carp1399
Z1	900108000002177	900108000000763	carp1404
Z1	900108000002177	900108000000763	carp1406
Z1	900108000002177	900108000000763	carp1416
Z1	900108000002177	900108000000763	carp1422
Z1	900108000002177	900108000000763	carp1443
Z1	900108000002177	900108000000763	carp1487
Z1	900108000002177	900108000000763	carp1491
Z1	900108000002177	900108000000763	carp1498
Z1	900108000002177	900108000000763	carp1507
Z1	900108000002177	900108000000763	carp1519
Z1	900108000002177	900108000000763	carp1544
Z1	900108000002177	900108000000763	carp1556
Z1	900108000002177	900108000000763	carp1589
Z1	900108000002177	900108000000763	carp1592
Z1	900108000002177	900108000000763	carp1596
Z1	900108000002177	900108000000763	carp1619
Z1	900108000002177	900108000000763	carp1634
Z1	900108000002177	900108000000763	carp1643
Z1	900108000002177	900108000000763	carp1646
Z1	900108000002177	900108000000763	carp1656
Z1	900108000002177	900108000000763	carp1685
Z1	900108000002177	900108000000763	carp1686
Z1	900108000002177	900108000000763	carp1689
Z1	900108000002177	900108000000763	carp1691
Z1	900108000002177	900108000000763	carp1694
Z1	900108000002177	900108000000763	carp1697
Z1	900108000002177	900108000000763	carp1704
Z1	900108000002177	900108000000763	carp1707
Z1	900108000002177	900108000000763	carp1713
Z1	900108000002177	900108000000763	carp1715
Z1	900108000002177	900108000000763	carp1722
Z1	900108000002177	900108000000763	carp1724
Z1	900108000002177	900108000000763	carp1732
Z1	900108000002177	900108000000763	carp1738
Z1	900108000002177	900108000000763	carp1748
Z1	900108000002177	900108000000763	carp1753
Z1	900108000002177	900108000000763	carp1755
Z1	900108000002177	900108000000763	carp1801
Z1	900108000002177	900108000000763	carp1814
Z1	900108000002177	900108000000763	carp1823
Z1	900108000002177	900108000000763	carp1831
Z1	900108000002177	900108000000763	carp1834
Z1	900108000002177	900108000000763	carp1836
Z1	900108000002177	900108000000763	carp1840
Z1	900108000002177	900108000000763	carp1849
Z1	900108000002177	900108000000763	carp1867
Z1	900108000002177	900108000000763	carp1873
Z1	900108000002177	900108000000763	carp1902
Z1	900108000002177	900108000000763	carp1914
Z1	900108000002177	900108000000763	carp1926
Z1	900108000002177	900108000000763	carp1929
Z1	900108000002177	900108000000763	carp1935
Z1	900108000002177	900108000000763	carp1952
Z1	900108000002177	900108000000763	carp1960
Z1	900108000002177	900108000000763	carp1961
Z1	900108000002177	900108000000763	carp1969
Z1	900108000002177	900108000000763	carp1974
Z1	900108000002177	900108000000763	carp1982
Z3	900108000000881	NA	carp1606
Z3	900108000000881	NA	carp1678
Z3	900108000000881	NA	carp1940
Z8	900108000000088	NA	carp1910
Z8	900108000000088	NA	carp1925
